# Supplementary material
Source: Elsevier journal article supplement (https://www.sciencedirect.com/science/article/pii/S0301054618301435)
Supplement: mmc1 [file S0301054618301435:mmc1.pdf]

## INQUÉRITO PARA PESQUISA DE REACÇÕES ADVERSAS A ALIMENTOS E ALERGIA ALIMENTAR (Q2- Questionário Completo)

Data: \_\_\_\_/\_\_\_\_/\_\_\_\_  
 Código: \_\_\_\_\_  
 Data de Nascimento : \_\_\_\_/\_\_\_\_/\_\_\_\_ Idade: \_\_\_\_\_ anos  
 Sexo: ☐ Masculino ☐ Feminino  
 Escola: \_\_\_\_\_  
 Entrevistado ☐ mãe ☐ pai ☐ outro

### 1. A sua criança tem algum problema de saúde ou reacção com alguma comida? (ou bebida?)

☐ Sim ☐ Não ☐ Não sabe

### 2. Qual é o alimento ou bebida que provoca reacção?

Leite ..... ☐ Sim ☐ Não ☐ Não sei

Ovo ..... ☐ Sim ☐ Não ☐ Não sei

Trigo ..... ☐ Sim ☐ Não ☐ Não sei

Peixe ..... ☐ Sim ☐ Não ☐ Não sei

Soja ..... ☐ Sim ☐ Não ☐ Não sei

Amendoim ..... ☐ Sim ☐ Não ☐ Não sei

Camarão ..... ☐ Sim ☐ Não ☐ Não sei

Marisco ..... ☐ Sim ☐ Não ☐ Não sei

Carne de porco .. ☐ Sim ☐ Não ☐ Não sei

Fruta ..... ☐ Sim, qual? \_\_\_\_\_ ☐ Não ☐ Não sei

Legumes ..... ☐ Sim, qual? \_\_\_\_\_ ☐ Não ☐ Não sei

Outra ..... ☐ Sim, qual? \_\_\_\_\_ ☐ Não ☐ Não sei

(Das perguntas 3 à 15, perguntar um alimento de cada vez, se houver vários suspeitos)

### 3. Quando a criança teve reacção, era a primeira vez que ela comia (ou bebia) esse alimento? (Sim/não/não sei; referir em que idades ocorreu)

| Idade \ Alimento implicado | 1ª ingestão | 1ª reacção | Não sei |
|----------------------------|-------------|------------|---------|
|                            |             |            |         |
|                            |             |            |         |
|                            |             |            |         |

**4. Quanto tempo depois de comer essa comida surgiu a reacção?** (Aguardar resposta espontânea e a seguir ler as opções)

| Alimento implicado | Até 2 horas (min) | Mais de 2 horas (H) | Bifásico | Não sei |
|--------------------|-------------------|---------------------|----------|---------|
|                    |                   |                     |          |         |
|                    |                   |                     |          |         |
|                    |                   |                     |          |         |

**5. Que reacção teve a sua criança depois de comer/beber esse alimento/bebida?**

(Aguardar resposta espontânea e a seguir ler as opções)

| <b>Sintomas</b> \ <b>Alimento implicado</b>                                            | <b>Sim</b> | <b>Não</b> |
|----------------------------------------------------------------------------------------|------------|------------|
| Tosse                                                                                  |            |            |
| Crise de espirros                                                                      |            |            |
| Obstrução nasal                                                                        |            |            |
| Dificuldade respiratória                                                               |            |            |
| Prurido da boca ou garganta                                                            |            |            |
| Edema da boca ou garganta                                                              |            |            |
| Prurido ocular                                                                         |            |            |
| Edema ocular                                                                           |            |            |
| Edema da face, orelhas, mãos ou pés                                                    |            |            |
| Prurido cutâneo                                                                        |            |            |
| Rubor ou calor da pele                                                                 |            |            |
| Máculas ou pápulas cutâneas                                                            |            |            |
| Nauseas ou vômitos                                                                     |            |            |
| Diarreia                                                                               |            |            |
| Cólicas abdominais                                                                     |            |            |
| Distensão abdominal                                                                    |            |            |
| Fezes com sangue                                                                       |            |            |
| Obstipação                                                                             |            |            |
| Cefaleias                                                                              |            |            |
| Tonturas ou lipotímia                                                                  |            |            |
| Outro? Qual? (Descrever: sudorese, palidez, cianose, síncope, palpitações, hipotensão) |            |            |

## 6. Como foi desencadeada a reacção?

| Alimento implicado | Contacto directo (mucosa) | Inalação | Ingestão | Não sabe |
|--------------------|---------------------------|----------|----------|----------|
|                    |                           |          |          |          |
|                    |                           |          |          |          |
|                    |                           |          |          |          |

## 7. Se a sua criança cheirar esse alimento ou este tocar na pele, fica com alguma reacção? (dificuldade respiratória, mácula ou pápula eritematosa, prurido, edema, vesículas)

| Alimento implicado | Contacto | Inalação | Ambos | Sem reacção | Não sabe |
|--------------------|----------|----------|-------|-------------|----------|
|                    |          |          |       |             |          |
|                    |          |          |       |             |          |
|                    |          |          |       |             |          |

## 8. Factores como exercício, ingestão de medicamentos ou outros podem estar relacionados com a reacção ao comer esses alimentos?

| Alimento implicado | Exercício | Fármaco (nome?) | Outro | Sem reacção | Não sabe |
|--------------------|-----------|-----------------|-------|-------------|----------|
|                    |           |                 |       |             |          |
|                    |           |                 |       |             |          |
|                    |           |                 |       |             |          |

## 9. Alguma vez a criança teve comichão, edema/inchaço ou dormência nos lábios, boca ou garganta, depois de comer outro alimento? (alguma fruta ou verdura crua)

| Alimento implicado | Sim (descrever sintomas) | Não | Não sabe |
|--------------------|--------------------------|-----|----------|
|                    |                          |     |          |
|                    |                          |     |          |
|                    |                          |     |          |

## 10. A criança teve de ir ao hospital quando teve reacção a esse alimento / bebida?

| Alimento implicado | Não | Sim, ida a Serviço de Urgência; mesmo dia | Sim, num outro dia | Não sabe |
|--------------------|-----|-------------------------------------------|--------------------|----------|
|                    |     |                                           |                    |          |
|                    |     |                                           |                    |          |
|                    |     |                                           |                    |          |

**11. A sua criança teve de tomar algum medicamento quando teve reacção a esse alimento/bebida?**

| Alimento implicado | Não fez | Adrenalina | Corticoide | Broncodilatador | Antihistamínico | Não sabe |
|--------------------|---------|------------|------------|-----------------|-----------------|----------|
|                    |         |            |            |                 |                 |          |
|                    |         |            |            |                 |                 |          |
|                    |         |            |            |                 |                 |          |

**12. Há quanto tempo teve lugar a última reacção?**

| Alimento implicado | < 1 mês | 1 mês – 1 ano | 1 – 5 Anos | > 5 anos | Não sabe |
|--------------------|---------|---------------|------------|----------|----------|
|                    |         |               |            |          |          |
|                    |         |               |            |          |          |
|                    |         |               |            |          |          |

**13. Depois da primeira reacção, a criança voltou a comer esse alimento? Por favor descreva a reacção, caso tenha havido uma.**

| Alimento implicado | Sim     |               |         | Não | Não sabe |
|--------------------|---------|---------------|---------|-----|----------|
|                    | A mesma | Outra (qual?) | Nenhuma |     |          |
|                    |         |               |         |     |          |
|                    |         |               |         |     |          |
|                    |         |               |         |     |          |

**14. Se a sua criança ingeriu o mesmo alimento mais do que uma vez, as reacções a esse alimento variaram em intensidade, ao longo do tempo, a esse alimento?**

| Alimento implicado | Todas as reacções com intensidade semelhante | 1ª reacção mais grave | Reacções foram-se agravando | Não sabe |
|--------------------|----------------------------------------------|-----------------------|-----------------------------|----------|
|                    |                                              |                       |                             |          |
|                    |                                              |                       |                             |          |
|                    |                                              |                       |                             |          |

**15. No total, quantos episódios de reacção adversa ao mesmo alimento teve a sua criança?**

| Alimento implicado | 1 | 2-5 | >5 | Não sei |
|--------------------|---|-----|----|---------|
|                    |   |     |    |         |
|                    |   |     |    |         |
|                    |   |     |    |         |

### 16. A sua criança tem outras alergias?

|                                            | <b>Sim</b>               | <b>Não</b> | <b>Não sabe</b> |
|--------------------------------------------|--------------------------|------------|-----------------|
| Asma/ cansaço                              |                          |            |                 |
| Alergias nasais / rinite                   |                          |            |                 |
| Na pele / Eczema atópico                   |                          |            |                 |
| Alergias nos olhos / Conjuntivite alérgica |                          |            |                 |
| Outras                                     | <input type="checkbox"/> | Descreva:  |                 |

### 17. Alguém da família tem alergia?

|                              | <b>Mãe</b> | <b>Pai</b> | <b>Irmão / Irmã</b> |
|------------------------------|------------|------------|---------------------|
| <b>Alergias alimentares</b>  |            |            |                     |
| <b>Asma</b>                  |            |            |                     |
| <b>Rinite alérgica</b>       |            |            |                     |
| <b>Conjuntivite alérgica</b> |            |            |                     |
| <b>Eczema atópico</b>        |            |            |                     |
