# Supplementary material
Source: Elsevier journal article supplement (https://www.sciencedirect.com/science/article/pii/S0301054618301435)
Supplement: mmc2 [file S0301054618301435:mmc2.pdf]

## QUESTIONNAIRE FOR SCREENING ADVERSE REACTIONS TO FOODS

### Q2 – Full Questionnaire

Date: \_\_\_\_/\_\_\_\_/\_\_\_\_

Code: \_\_\_\_\_

Date of Birth : \_\_\_\_/\_\_\_\_/\_\_\_\_ Age: \_\_\_\_\_ years

Gender: ☐ Male ☐ Female

School: \_\_\_\_\_

Interviewee: ☐ mother ☐ father ☐ other

#### 1. Does your child have any health problem or reaction with any food or drink?

☐ Yes ☐ No ☐ Does not know

#### 2. Which food or drink triggers a reaction?

Milk.....☐ Yes ☐ No ☐ Does not know

Egg.....☐ Yes ☐ No ☐ Does not know

Wheat.....☐ Yes ☐ No ☐ Does not know

Fish.....☐ Yes ☐ No ☐ Does not know

Soya.....☐ Yes ☐ No ☐ Does not know

Peanut.....☐ Yes ☐ No ☐ Does not know

Shrimp.....☐ Yes ☐ No ☐ Does not know

Other Shellfish...☐ Yes ☐ No ☐ Does not know

Pork.....☐ Yes ☐ No ☐ Does not know

Fresh fruit.....☐ Yes, Which? \_\_\_\_\_ ☐ No ☐ Does not know

Legumes.....☐ Yes, Which? \_\_\_\_\_ ☐ No ☐ Does not know

Other .....☐ Yes, Which? \_\_\_\_\_ ☐ No ☐ Does not know

(In questions 3 to 15, ask about each food, if there is more than one suspected food)

#### 3. When your child had the reaction, was that the first time that he/she ate (or drank) that food? (Yes/no/does not know; state how old your child was when that reaction took place)

| Suspected food \ Age | Age | 1st ingestion | 1st reaction | Does not know |
|----------------------|-----|---------------|--------------|---------------|
|                      |     |               |              |               |
|                      |     |               |              |               |
|                      |     |               |              |               |

**4. How long after having eaten the food did the reaction occur?** (Await spontaneous response and only read the options subsequently)

| <b>Suspected food</b> | <b>Up to 2 hours / (min)</b> | <b>More than 2 hours/ (H)</b> | <b>Biphasic</b> | <b>Does not know</b> |
|-----------------------|------------------------------|-------------------------------|-----------------|----------------------|
|                       |                              |                               |                 |                      |
|                       |                              |                               |                 |                      |
|                       |                              |                               |                 |                      |

**5. What type of reaction did your child have after having eaten / drunk that food/drink?**  
(Await spontaneous response and only read the options subsequently)

| <b>Suspected food</b>                                                                                 | <b>Yes</b> | <b>No</b> |
|-------------------------------------------------------------------------------------------------------|------------|-----------|
| <b>Symptoms</b>                                                                                       |            |           |
| Cough                                                                                                 |            |           |
| Sneezing bout                                                                                         |            |           |
| Nasal congestion                                                                                      |            |           |
| Shortness of breath                                                                                   |            |           |
| Itchy mouth or throat                                                                                 |            |           |
| Swelling of lips, mouth or throat                                                                     |            |           |
| Itchy eyes                                                                                            |            |           |
| Swelling of eyelids                                                                                   |            |           |
| Swelling of face, ears, hands or feet                                                                 |            |           |
| Itchy skin                                                                                            |            |           |
| Red or hot skin                                                                                       |            |           |
| Skin rash (macules and papules)                                                                       |            |           |
| Nausea or vomiting                                                                                    |            |           |
| Diarrhoea                                                                                             |            |           |
| Abdominal pain or cramps                                                                              |            |           |
| Abdominal bloating                                                                                    |            |           |
| Blood in stools                                                                                       |            |           |
| Constipation                                                                                          |            |           |
| Headaches                                                                                             |            |           |
| Dizziness or fainting                                                                                 |            |           |
| Other? Which type? (Describe: Sweating, pallour, cyanosis, syncope, palpitations, low blood pressure) |            |           |

## 6. How was the reaction triggered by the food/drink?

| Suspected food | Direct Contact (mucosal) | Inhalation | Ingestion | Does not know |
|----------------|--------------------------|------------|-----------|---------------|
|                |                          |            |           |               |
|                |                          |            |           |               |
|                |                          |            |           |               |

## 7. If your child smells that food or it touches his/her skin, does he/she have any reaction?

(shortness of breath, nasal congestion, erythema, itch, urticarial rash, other)

| Suspected food | Contact | Inhalation | Both | No reaction | Does not know |
|----------------|---------|------------|------|-------------|---------------|
|                |         |            |      |             |               |
|                |         |            |      |             |               |
|                |         |            |      |             |               |

## 8. Were factors such as physical exercise, ingestion of medication or any other, associated with the reactions to foods?

| Suspected food | Exercise | Drug (name?) | Other | No reaction | Does not know |
|----------------|----------|--------------|-------|-------------|---------------|
|                |          |              |       |             |               |
|                |          |              |       |             |               |
|                |          |              |       |             |               |

## 9. Did your child ever have itchy, swollen or tingling lips, mouth or throat after having eaten any other food? (open question, followed by asking about any fresh fruit or legumes)

| Suspected food | Yes (describe symptoms) | No | Does not know |
|----------------|-------------------------|----|---------------|
|                |                         |    |               |
|                |                         |    |               |
|                |                         |    |               |

## 10. Was your child taken to hospital when he/she had the reaction to food / drink?

| Suspected food | No | Yes, to casualty department; same day | Yes, on a different day | Does not know |
|----------------|----|---------------------------------------|-------------------------|---------------|
|                |    |                                       |                         |               |
|                |    |                                       |                         |               |
|                |    |                                       |                         |               |

**11. Did your child have to be given any medication when he/she had the reaction?**

| Suspected food | No | Adrenaline | Corticosteroid | Bronchodilatador | Antihistamine | Does not know |
|----------------|----|------------|----------------|------------------|---------------|---------------|
|                |    |            |                |                  |               |               |
|                |    |            |                |                  |               |               |
|                |    |            |                |                  |               |               |

**12. How long ago did the last reaction take place?**

| Suspected food | < 1 Month ago | 1 month – 1 year ago | 1-5 years ago | > 5 years ago | Does not know |
|----------------|---------------|----------------------|---------------|---------------|---------------|
|                |               |                      |               |               |               |
|                |               |                      |               |               |               |
|                |               |                      |               |               |               |

**13. After the first reaction, did your child eat the same suspect food again? Please describe the reaction, in case there was one.**

| Suspected food | Yes           |                             |             | No | Does not know |
|----------------|---------------|-----------------------------|-------------|----|---------------|
|                | Same reaction | Other reaction (What type?) | No reaction |    |               |
|                |               |                             |             |    |               |
|                |               |                             |             |    |               |
|                |               |                             |             |    |               |

**14. If your child ate the food more than once, have reactions to it changed in severity over time, to the same food?**

| Suspected food | All reactions of same intensity | First reaction was the most severe one | Reactions have become more severe | Does not know |
|----------------|---------------------------------|----------------------------------------|-----------------------------------|---------------|
|                |                                 |                                        |                                   |               |
|                |                                 |                                        |                                   |               |
|                |                                 |                                        |                                   |               |

**15. In total, how many episodes of adverse reactions to the same food did your child have?**

| Suspected food | 1 | 2-5 | >5 | Does not know |
|----------------|---|-----|----|---------------|
|                |   |     |    |               |
|                |   |     |    |               |
|                |   |     |    |               |

# 16. Does your child have any other allergies?

|                                        | Yes |           | No | Does not know |
|----------------------------------------|-----|-----------|----|---------------|
| Asthma                                 |     |           |    |               |
| Nasal allergies / rhinitis             |     |           |    |               |
| Cutaneous / atopic dermatitis          |     |           |    |               |
| Eye allergies /allergic conjunctivitis |     |           |    |               |
| Other                                  |     | Describe: |    |               |

# 17. Does anyone in the child's family have any allergies?

|                                | Mother | Father | Brother / Sister |
|--------------------------------|--------|--------|------------------|
| <b>Food allergies</b>          |        |        |                  |
| <b>Asthma</b>                  |        |        |                  |
| <b>Allergic rhinitis</b>       |        |        |                  |
| <b>Allergic Conjunctivitis</b> |        |        |                  |
| <b>Atopic Dermatitis</b>       |        |        |                  |
